# Supplementary material for: Varied Length Stokes Shift BODIPY-Based Fluorophores for Multicolor Microscopy
Source: PubMed Central journal article supplement (PMC5854673; doi:10.1038/s41598-018-22892-8), 2018-03-15
Supplement: 41598_2018_22892_MOESM1_ESM.pdf [file 41598_2018_22892_MOESM1_ESM.pdf]

# Supplementary Information

## Varied Length Stokes Shift BODIPY-Based Fluorophores for Multicolor Microscopy

Amy M. Bittel<sup>1</sup>, Ashley M. Davis<sup>1</sup>, Lei Wang<sup>1</sup>, Michel A. Nederlof<sup>4</sup>, Jorge O. Escobedo<sup>5</sup>, Robert M. Strongin<sup>5</sup>, Summer L. Gibbs<sup>1,2,3§</sup>

<sup>1</sup>Biomedical Engineering Department, <sup>2</sup>Knight Cancer Institute, <sup>3</sup>OHSU Center for Spatial Systems Biomedicine, Oregon Health & Science University, Portland, OR 97201, <sup>4</sup>Quantitative Imaging, Pittsburgh, PA 15238, <sup>5</sup>Department of Chemistry, Portland State University, Portland, OR 97201

§Corresponding Author:

Summer L. Gibbs, Ph.D.  
Oregon Health & Science University  
Collaborative Life Sciences Building  
2730 SW Moody Ave, Mail Code: CL3SG  
Portland, OR 97201  
Email: [gibbss@ohsu.edu](mailto:gibbss@ohsu.edu)  
Phone: 503-494-8940

**Table S1:** Chemical structures and LCMS calculated purity data for BAA library.

| Product | Aromatic Aldehyde                                                                   | Final Structure                                                                     | m/z calc | m/z exp             | RT (min) | Purity (%) |
|---------|-------------------------------------------------------------------------------------|-------------------------------------------------------------------------------------|----------|---------------------|----------|------------|
| BAA-1b  | 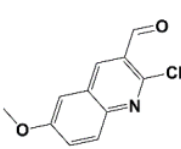   |    | 698.15   | 699.15              | 7.83     | 92         |
| BAA-2a  |    |    | 419.16   | 400.16 <sup>a</sup> | 7.66     | >99        |
| BAA-3a  |    |   | 566.07   | 567.95              | 8.07     | 98         |
| BAA-3b  |  |  | 840.02   | 863.25 <sup>b</sup> | 8.21     | 97         |
| BAA-4a  |  |  | 478.24   | 479.24              | 6.02     | >99        |
| BAA-5a  |  |  | 470.18   | 471.19              | 8.26     | >99        |

| Product | Aromatic Aldehyde                                                                   | Final Structure                                                                     | m/z calc | m/z exp             | RT (min) | Purity (%) |
|---------|-------------------------------------------------------------------------------------|-------------------------------------------------------------------------------------|----------|---------------------|----------|------------|
| BAA-6a  | 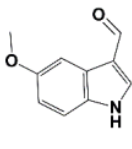   |    | 449.17   | 472.18 <sup>b</sup> | 7.69     | 82         |
| BAA-7a  |    |    | 454.19   | 477.27 <sup>b</sup> | 8.64     | 83         |
| BAA-7b  |    |    | 616.26   | 617.26              | 7.32     | 88         |
| BAA-8a  |  |   | 460.18   | 461.19              | 8.31     | 80         |
| BAA-9a  |  |  | 454.17   | 455.13              | 8.15     | 92         |
| BAA-10b |  |  | 610.33   | 611.35              | 9.45     | >99        |
| BAA-11a |  |  | 514.22   | 515.22              | 8.98     | 91         |

| Product | Aromatic Aldehyde                                                                   | Final Structure                                                                     | m/z calc | m/z exp             | RT (min) | Purity (%) |
|---------|-------------------------------------------------------------------------------------|-------------------------------------------------------------------------------------|----------|---------------------|----------|------------|
| BAA-12a | 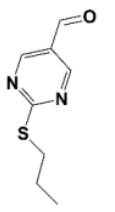   |    | 456.16   | 474.19 <sup>c</sup> | 7.69     | 88         |
| BAA-13a |    |    | 428.15   | 429.15              | 7.28     | 90         |
| BAA-14a |    |    | 442.17   | 465.16 <sup>b</sup> | 9.153    | 83         |
| BAA-15a |  |  | 450.19   | 451.19              | 8.83     | 96         |
| BAA-16a |  |  | 422.2    | 445.19 <sup>b</sup> | 9.08     | 98         |
| BAA-17a |  |  | 456.18   | 479.17 <sup>b</sup> | 9.09     | 85         |
| BAA-18a |  |  | 486.19   | 509.18 <sup>b</sup> | 8.94     | 92         |



| Product | Aromatic Aldehyde                                                                   | Final Structure                                                                     | m/z calc | m/z exp             | RT (min) | Purity (%) |
|---------|-------------------------------------------------------------------------------------|-------------------------------------------------------------------------------------|----------|---------------------|----------|------------|
| BAA-19a | 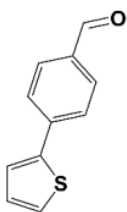   |    | 462.14   | 485.13 <sup>b</sup> | 8.94     | 96         |
| BAA-20a |    |    | 442.14   | 443.15              | 8.07     | 98         |
| BAA-21a |    |    | 516.2    | 497.21 <sup>a</sup> | 9.13     | 95         |
| BAA-21b |  |   | 740.29   | 741.29              | 7.82     | 92         |
| BAA-22a |  |  | 534.19   | 515.20 <sup>a</sup> | 8.65     | 94         |
| BAA-22b |  |  | 776.27   | 777.28              | 7.51     | 90         |
| BAA-23a |  |  | 525.16   | 526.18              | 9.05     | >99        |

| Product | Aromatic Aldehyde                                                                   | Final Structure                                                                     | m/z calc | m/z exp             | RT (min) | Purity (%) |
|---------|-------------------------------------------------------------------------------------|-------------------------------------------------------------------------------------|----------|---------------------|----------|------------|
| BAA-23b | 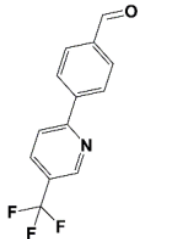   |    | 758.21   | 739.13 <sup>a</sup> | 7.93     | 89         |
| BAA-24b |    |    | 719.98   | 700.98 <sup>a</sup> | 7.46     | 94         |
| BAA-25a |    |    | 524.73   | 547.12 <sup>b</sup> | 9.30     | 93         |
| BAA-25b |  |   | 756.14   | 757.15              | 7.88     | 95         |
| BAA-26b |  |  | 672.32   | 673.33              | 7.56     | 98         |
| BAA-27b |  |  | 720.16   | 683.22 <sup>d</sup> | 7.19     | 97         |
| BAA-28a |  |  | 454.24   | 435.28 <sup>a</sup> | 6.69     | 88         |

| Product | Aromatic Aldehyde                                                                   | Final Structure                                                                     | m/z calc | m/z exp             | RT (min) | Purity (%) |
|---------|-------------------------------------------------------------------------------------|-------------------------------------------------------------------------------------|----------|---------------------|----------|------------|
| BAA-28b | 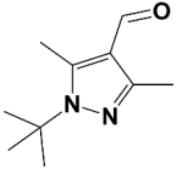   |    | 616.35   | 617.37              | 6.99     | 97         |
| BAA-29b |    |    | 604.03   | 605.03              | 8.14     | 86         |
| BAA-30a |    |    | 491.18   | 492.19              | 7.41     | 96         |
| BAA-31b |  |   | 536.28   | 497.15 <sup>d</sup> | 6.34     | 94         |
| BAA-32a |  |  | 517.16   | 478.15 <sup>d</sup> | 8.77     | >99        |
| BAA-33a |  |  | 536.04   | 559.02 <sup>b</sup> | 7.94     | 98         |
| BAA-34b |  |  | 702.07   | 683.06 <sup>a</sup> | 7.69     | 94         |

| Product              | Aromatic Aldehyde                                                                   | Final Structure                                                                     | m/z calc | m/z exp             | RT (min) | Purity (%) |
|----------------------|-------------------------------------------------------------------------------------|-------------------------------------------------------------------------------------|----------|---------------------|----------|------------|
| BAA-35b              | 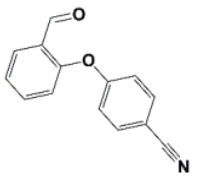   |    | 702.22   | 703.15              | 8.49     | 86         |
| BAA-36b              |    |    | 742.17   | 743.18              | 8.16     | 94         |
| BAA-37a              |    |    | 457.18   | 438.18 <sup>a</sup> | 5.75     | 88         |
| BAA-37b              |  |   | 622.24   | 623.24              | 5.78     | >99        |
| BAA-38a              |  |  | 450.2    | 451.21              | 6.28     | 99         |
| BAA-39a <sup>g</sup> |  |  | 415.11   | 451.21 <sup>g</sup> | 5.99     | 94         |
| BAA-40b              |  |  | 876.26   | 877.27              | 7.96     | 89         |

| Product | Aromatic Aldehyde                                                                   | Final Structure                                                                     | m/z calc | m/z exp             | RT (min) | Purity (%) |
|---------|-------------------------------------------------------------------------------------|-------------------------------------------------------------------------------------|----------|---------------------|----------|------------|
| BAA-41b | 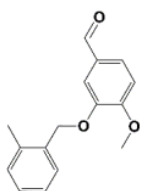   |    | 768.32   | 769.33              | 7.61     | 94         |
| BAA-42a |    |    | 568.09   | 501.17 <sup>e</sup> | 6.17     | 82         |
| BAA-43a |    |    | 534.13   | 501.17 <sup>f</sup> | 6.13     | 94         |
| BAA-44b |   |   | 876.26   | 877.27              | 8.15     | 92         |
| BAA-45a |  |  | 538.75   | 562.14 <sup>b</sup> | 9.29     | >99        |
| BAA-45b |  |  | 784.17   | 785.17              | 8.24     | 96         |
| BAA-46b |  |  | 740.29   | 741.28              | 7.69     | 94         |

| Product | Aromatic Aldehyde                                                                   | Final Structure                                                                     | m/z calc | m/z exp             | RT (min) | Purity (%) |
|---------|-------------------------------------------------------------------------------------|-------------------------------------------------------------------------------------|----------|---------------------|----------|------------|
| BAA-47a | 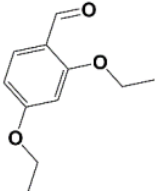   |    | 468.2    | 491.20 <sup>b</sup> | 8.62     | 94         |
| BAA-48a |    |    | 525.2    | 548.19 <sup>b</sup> | 8.24     | >99        |
| BAA-49b |    |    | 638.21   | 619.21 <sup>a</sup> | 6.58     | >99        |
| BAA-50a |  |   | 460.19   | 483.18 <sup>b</sup> | 8.07     | >99        |
| BAA-50b |  |  | 628.26   | 629.25              | 6.94     | >99        |
| BAA-51a |  |  | 491.18   | 514.16 <sup>b</sup> | 7.59     | 89         |
| BAA-52a |  |  | 498.13   | 499.12              | 7.86     | 83         |

| Product | Aromatic Aldehyde                                                                   | Final Structure                                                                     | m/z calc | m/z exp | RT (min) | Purity (%) |
|---------|-------------------------------------------------------------------------------------|-------------------------------------------------------------------------------------|----------|---------|----------|------------|
| BAA-53a | 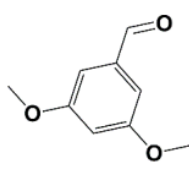   |    | 440.17   | 441.17  | 7.57     | >99        |
| BAA-54a |    |    | 432.1    | 433.09  | 7.98     | 89         |
| BAA-55a |    |    | 460.19   | 461.18  | 7.30     | >99        |
| BAA-55b |  |  | 628.26   | 629.26  | 6.89     | 89         |
| BAA-56a |  |  | 463.13   | 464.13  | 5.87     | >99        |
| BAA-56b |  |  | 634.15   | 635.15  | 7.84     | 84         |
| BAA-57a |  |  | 474.2    | 475.21  | 6.10     | 85         |

| Product | Aromatic Aldehyde                                                                   | Final Structure                                                                     | m/z calc | m/z exp             | RT (min) | Purity (%) |
|---------|-------------------------------------------------------------------------------------|-------------------------------------------------------------------------------------|----------|---------------------|----------|------------|
| BAA-57b | 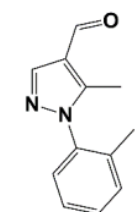   |    | 656.29   | 657.30              | 8.01     | >99        |
| BAA-58a |    |    | 514.19   | 515.18              | 8.20     | >99        |
| BAA-59a |    |    | 535.15   | 553.16 <sup>c</sup> | 7.37     | 96         |
| BAA-60b |   |   | 644.07   | 645.08              | 8.11     | 99         |
| BAA-61a |  |  | 496.22   | 497.21              | 7.32     | 98         |
| BAA-62a |  |  | 431.16   | 449.16 <sup>c</sup> | 6.81     | >99        |
| BAA-63a |  |  | 479.14   | 502.15 <sup>b</sup> | 7.05     | 93         |



| Product | Aromatic Aldehyde                                                                   | Final Structure                                                                     | m/z calc | m/z exp             | RT (min) | Purity (%) |
|---------|-------------------------------------------------------------------------------------|-------------------------------------------------------------------------------------|----------|---------------------|----------|------------|
| BAA-64a | 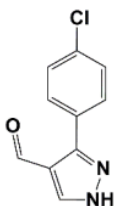   |    | 480.13   | 481.11              | 7.50     | 91         |
| BAA-65a |    |    | 464.15   | 427.14 <sup>d</sup> | 8.82     | 88         |
| BAA-66a |    |    | 497.09   | 498.10              | 9.09     | 93         |
| BAA-67a |   |   | 517.18   | 518.18              | 9.02     | 92         |
| BAA-68a |  |  | 463.13   | 464.14              | 8.27     | >99        |
| BAA-69a |  |  | 525.1    | 526.09              | 9.08     | >99        |
| BAA-70a |  |  | 525.16   | 526.18              | 8.95     | 99         |

| Product | Aromatic Aldehyde                                                                   | Final Structure                                                                     | m/z calc | m/z exp             | RT (min) | Purity (%) |
|---------|-------------------------------------------------------------------------------------|-------------------------------------------------------------------------------------|----------|---------------------|----------|------------|
| BAA-71a | 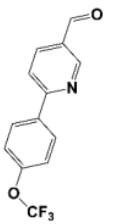   |    | 541.16   | 542.17              | 9.06     | >99        |
| BAA-72a |    |    | 493.16   | 511.17 <sup>c</sup> | 8.13     | 98         |
| BAA-73a |    |    | 502.09   | 503.08              | 7.95     | >99        |
| BAA-74a |  |  | 604.22   | 627.21 <sup>b</sup> | 8.02     | 92         |
| BAA-74b |  |  | 916.32   | 897.32 <sup>a</sup> | 7.01     | 94         |
| BAA-75a |  |  | 501.21   | 482.22 <sup>a</sup> | 10.99    | >99        |
| BAA-75b |  |  | 710.31   | 711.32              | 6.38     | 94         |

| Product | Aromatic Aldehyde                                                                   | Final Structure                                                                     | m/z calc | m/z exp             | RT (min) | Purity (%) |
|---------|-------------------------------------------------------------------------------------|-------------------------------------------------------------------------------------|----------|---------------------|----------|------------|
| BAA-76a | 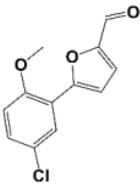   |    | 510.13   | 491.13 <sup>a</sup> | 90.31    | 98         |
| BAA-77a |    |    | 525.2    | 506.21 <sup>a</sup> | 8.52     | 99         |
| BAA-78a |    |    | 531.18   | 512.18 <sup>a</sup> | 8.72     | >99        |
| BAA-78b |   |   | 770.24   | 771.24              | 7.73     | 98         |
| BAA-79a |  |  | 494.14   | 457.13 <sup>d</sup> | 9.421    | 91         |

LCMS Conditions: A: H<sub>2</sub>O-CH<sub>2</sub>O<sub>2</sub>: 99.9:0.1, B: ACN-CH<sub>2</sub>O<sub>2</sub>: 99.9:0.1; gradient 5% B to 30% B (1 min), gradient 30% B to 95% B (4.5 min), isocratic 95% B (4.5 min), flowrate: 0.4 ml/min. ESI (+) *m/z* signal found correspond to (M+H) except *a*: (M-F), *b*: (M+Na), *c*: (M+NH<sub>4</sub>), *d*: (M-2F+H), *e*: (M-2Cl+H), and *f*: (M-Cl); *g*: Cl replaced by pyrrolidine during synthesis reaction. Purity was determined by integration of all the LCMS absorbance peaks at 254 nm.

**Table S2:** *Spectroscopic and photochemical properties of BAA library.*

| Product | $\lambda_{\text{max ABS}}$<br>(nm) | $\lambda_{\text{max EM}}$<br>(nm) | Stokes Shift<br>(nm) | $\Phi_{\text{fl}}$ | FWHM |
|---------|------------------------------------|-----------------------------------|----------------------|--------------------|------|
| BAA-1b  | 580                                | 597                               | 17                   | 0.62               | 40   |
| BAA-2a  | 601                                | 635                               | 34                   | 0.62               | 57   |
| BAA-3a  | 569                                | 579                               | 10                   | 0.61               | 31   |
| BAA-3b  | 574                                | 587                               | 13                   | 0.70               | 34   |
| BAA-4a  | 581                                | 600                               | 19                   | 0.43               | 56   |
| BAA-5a  | 592                                | 615                               | 23                   | 0.83               | 47   |
| BAA-6a  | 609                                | 643                               | 34                   | 0.18               | 64   |
| BAA-7a  | 582                                | 600                               | 18                   | 0.29               | 63   |
| BAA-7b  | 581                                | 600                               | 19                   | 0.43               | 56   |
| BAA-8a  | 594                                | 623                               | 29                   | 0.50               | 61   |
| BAA-9a  | 569                                | 579                               | 10                   | 0.35               | 32   |
| BAA-10b | 632                                | 714                               | 82                   | 0.01               | 102  |
| BAA-11a | 575                                | 589                               | 14                   | 0.86               | 33   |
| BAA-12a | 589                                | 616                               | 27                   | 0.10               | 88   |
| BAA-13a | 576                                | 586                               | 10                   | 0.19               | 44   |
| BAA-14a | 594                                | 607                               | 13                   | 0.44               | 70   |
| BAA-15a | 581                                | 597                               | 16                   | 0.42               | 39   |
| BAA-16a | 552                                | 610                               | 58                   | 0.22               | 78   |
| BAA-17a | 579                                | 591                               | 12                   | 0.59               | 42   |
| BAA-18a | 577                                | 593                               | 16                   | 0.65               | 37   |
| BAA-19a | 582                                | 595                               | 13                   | 0.64               | 35   |
| BAA-20a | 577                                | 585                               | 8                    | 0.15               | 31   |
| BAA-21a | 585                                | 611                               | 26                   | 0.51               | 46   |
| BAA-21b | 588                                | 608                               | 20                   | 0.54               | 50   |
| BAA-22a | 585                                | 602                               | 17                   | 0.39               | 49   |
| BAA-22b | 582                                | 601                               | 19                   | 0.27               | 46   |
| BAA-23a | 592                                | 603                               | 11                   | 0.23               | 30   |
| BAA-23b | 580                                | 588                               | 8                    | 0.19               | 32   |
| BAA-24b | 570                                | 579                               | 9                    | 0.29               | 32   |
| BAA-25a | 571                                | 580                               | 9                    | 0.19               | 32   |
| BAA-25b | 572                                | 580                               | 8                    | 0.18               | 32   |
| BAA-26b | 582                                | 604                               | 22                   | 0.30               | 51   |
| BAA-27b | 575                                | 588                               | 13                   | 0.33               | 35   |
| BAA-28a | 480                                | 592                               | 112                  | 0.04               | 52   |
| BAA-28b | 580                                | 598                               | 18                   | 0.58               | 43   |
| BAA-29b | 569                                | 580                               | 11                   | 0.13               | 37   |
| BAA-30a | 607                                | 643                               | 36                   | 0.43               | 58   |

| Product | $\lambda_{\text{max ABS}}$<br>(nm) | $\lambda_{\text{max EM}}$<br>(nm) | Stokes Shift<br>(nm) | $\Phi_{\text{fl}}$ | FWHM |
|---------|------------------------------------|-----------------------------------|----------------------|--------------------|------|
| BAA-31b | 576                                | 588                               | 12                   | 0.28               | 34   |
| BAA-32a | 574                                | 584                               | 10                   | 0.23               | 32   |
| BAA-33a | 575                                | 587                               | 12                   | 0.15               | 35   |
| BAA-34b | 570                                | 581                               | 11                   | 0.96               | 31   |
| BAA-35b | 571                                | 580                               | 9                    | 0.25               | 32   |
| BAA-36b | 579                                | 592                               | 13                   | 0.35               | 37   |
| BAA-37a | 568                                | 578                               | 10                   | 0.54               | 55   |
| BAA-37b | 569                                | 578                               | 9                    | 0.55               | 30   |
| BAA-38a | 579                                | 581                               | 2                    | 0.07               | 33   |
| BAA-39a | 606                                | 657                               | 51                   | 0.19               | 79   |
| BAA-40b | 583                                | 601                               | 18                   | 0.26               | 45   |
| BAA-41b | 582                                | 602                               | 20                   | 0.36               | 47   |
| BAA-42a | 570                                | 580                               | 10                   | 0.36               | 30   |
| BAA-43a | 569                                | 579                               | 10                   | 0.45               | 31   |
| BAA-44b | 582                                | 600                               | 18                   | 0.28               | 43   |
| BAA-45b | 570                                | 579                               | 9                    | 0.50               | 30   |
| BAA-45a | 571                                | 580                               | 9                    | 0.22               | 31   |
| BAA-46b | 572                                | 585                               | 13                   | 0.61               | 33   |
| BAA-47a | 589                                | 611                               | 22                   | 0.33               | 47   |
| BAA-48a | 603                                | 641                               | 38                   | 0.45               | 60   |
| BAA-49b | 571                                | 580                               | 9                    | 0.14               | 33   |
| BAA-50a | 571                                | 581                               | 10                   | 0.28               | 33   |
| BAA-50b | 572                                | 581                               | 9                    | 0.12               | 34   |
| BAA-51a | 594                                | 607                               | 13                   | 0.06               | 42   |
| BAA-52a | 577                                | 585                               | 8                    | 0.04               | 51   |
| BAA-53a | 570                                | 581                               | 11                   | 0.44               | 30   |
| BAA-54a | 573                                | 581                               | 8                    | 0.04               | 46   |
| BAA-55a | 576                                | 592                               | 16                   | 0.75               | 35   |
| BAA-55b | 575                                | 591                               | 16                   | 0.75               | 38   |
| BAA-56a | 585                                | 595                               | 10                   | 0.91               | 32   |
| BAA-56b | 586                                | 597                               | 11                   | 0.15               | 35   |
| BAA-57a | 574                                | 590                               | 16                   | 0.75               | 45   |
| BAA-57b | 575                                | 591                               | 16                   | 0.75               | 38   |
| BAA-58a | 572                                | 582                               | 10                   | 0.70               | 30   |
| BAA-59a | 571                                | 581                               | 10                   | 0.53               | 30   |
| BAA-60b | 588                                | 604                               | 16                   | 0.47               | 37   |
| BAA-61a | 573                                | 587                               | 14                   | >0.99              | 35   |
| BAA-62a | 579                                | 594                               | 15                   | 0.68               | 33   |
| BAA-63a | 592                                | 607                               | 15                   | 0.43               | 39   |

| Product | $\lambda_{\text{max ABS}}$<br>(nm) | $\lambda_{\text{max EM}}$<br>(nm) | Stokes Shift<br>(nm) | $\Phi_{\text{fl}}$ | FWHM |
|---------|------------------------------------|-----------------------------------|----------------------|--------------------|------|
| BAA-64a | 576                                | 593                               | 17                   | 0.80               | 37   |
| BAA-65a | 606                                | 622                               | 16                   | 0.21               | 54   |
| BAA-66a | 587                                | 598                               | 11                   | 0.28               | 34   |
| BAA-67a | 587                                | 598                               | 11                   | 0.15               | 61   |
| BAA-68a | 585                                | 595                               | 10                   | 0.17               | 30   |
| BAA-69a | 577                                | 589                               | 12                   | 0.85               | 30   |
| BAA-70a | 580                                | 588                               | 8                    | 0.17               | 33   |
| BAA-71a | 580                                | 589                               | 9                    | 0.19               | 32   |
| BAA-72a | 580                                | 590                               | 10                   | 0.40               | 31   |
| BAA-73a | 579                                | 593                               | 14                   | 0.55               | 46   |
| BAA-74a | 584                                | 602                               | 18                   | 0.15               | 59   |
| BAA-74b | 583                                | 600                               | 17                   | 0.22               | 51   |
| BAA-75a | 614                                | 663                               | 49                   | 0.08               | 91   |
| BAA-75b | 605                                | 660                               | 55                   | 0.18               | 91   |
| BAA-76a | 613                                | 634                               | 21                   | 0.21               | 55   |
| BAA-77a | 603                                | 634                               | 31                   | 0.50               | 61   |
| BAA-78a | 581                                | 592                               | 11                   | 0.19               | 46   |
| BAA-78b | 579                                | 593                               | 14                   | 0.37               | 39   |
| BAA-79a | 606                                | 630                               | 24                   | 0.63               | 49   |

**Table S3:** *Organelle specificity of BAA Library in fixed U2OS cells.*

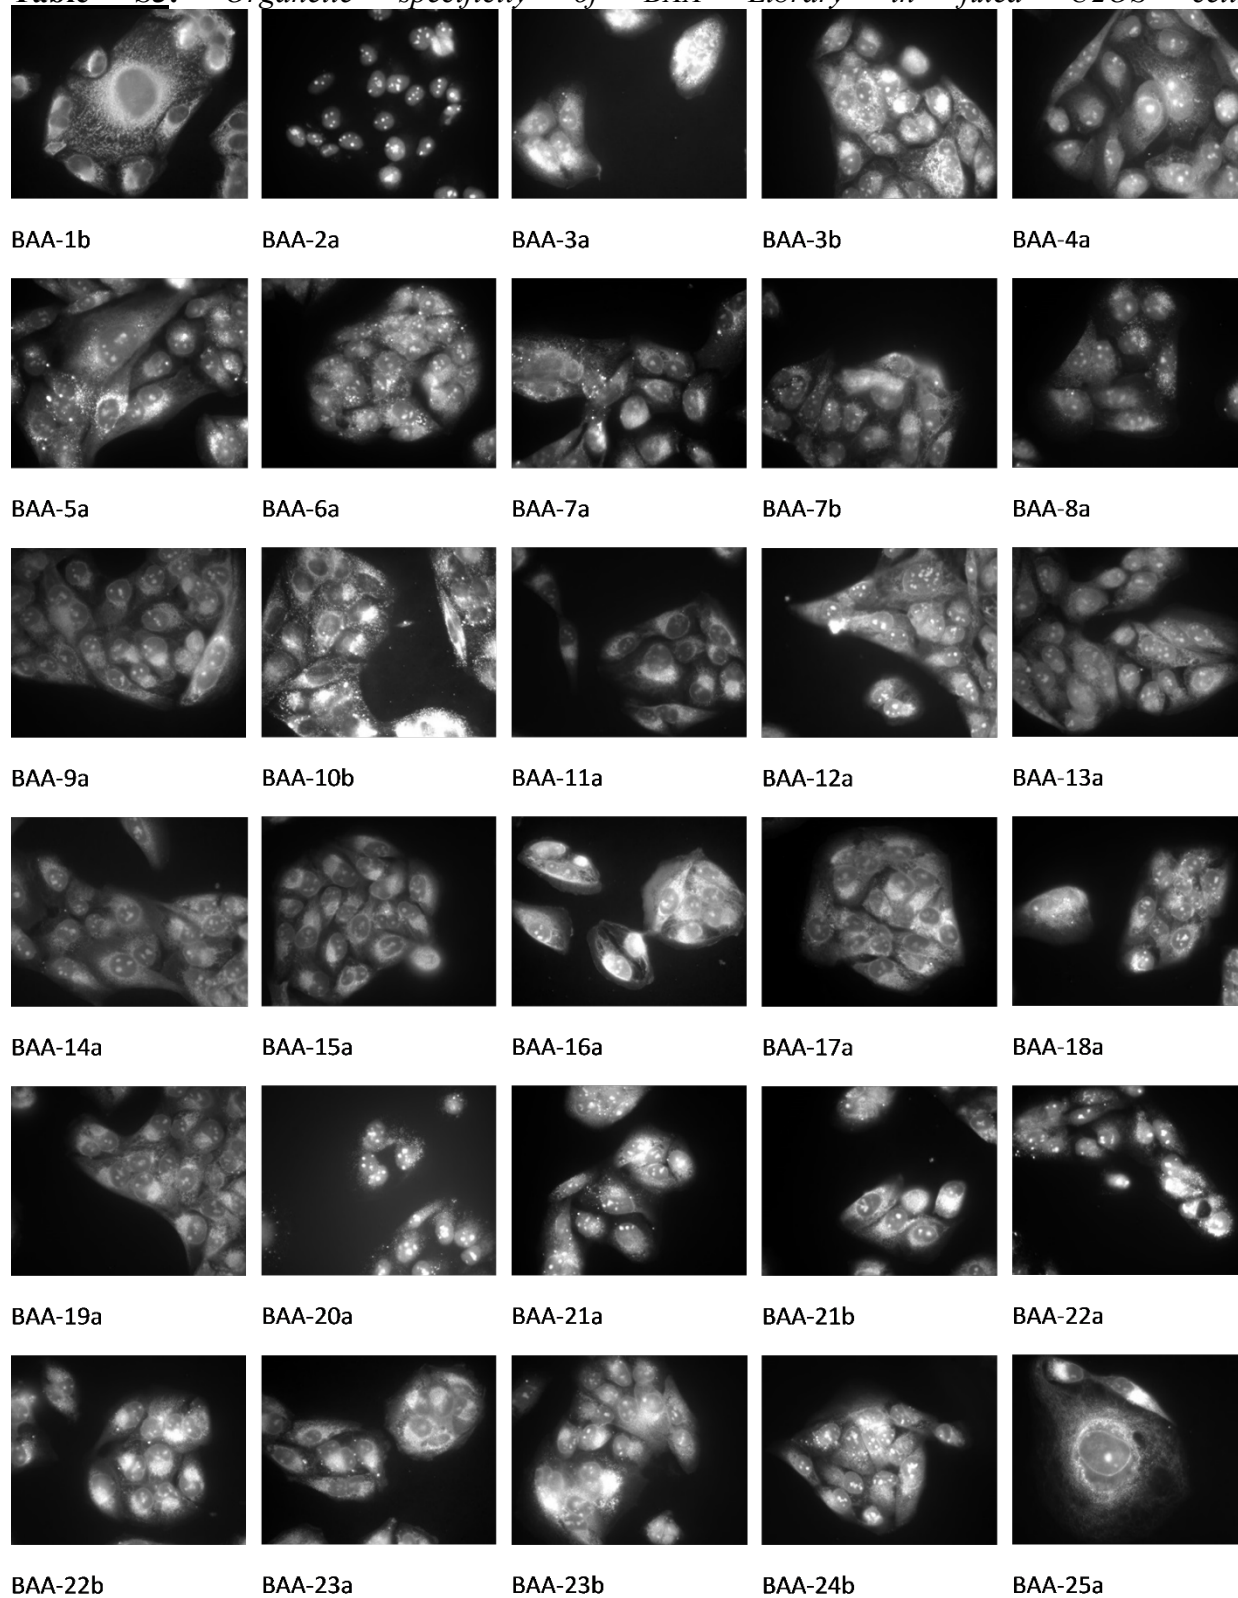

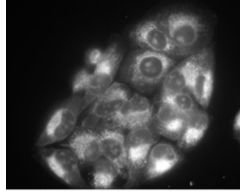

BAA-25b

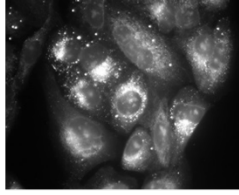

BAA-26b

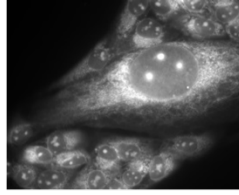

BAA-27b

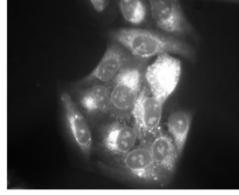

BAA-28a

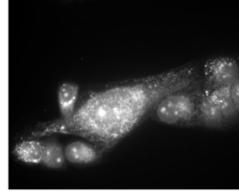

BAA28-b

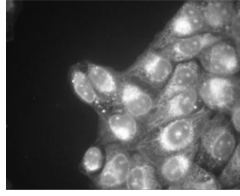

BAA-29b

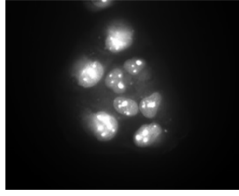

BAA-30a

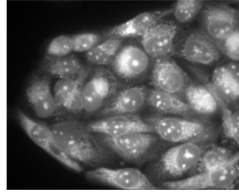

BAA-31b

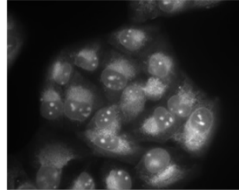

BAA-32a

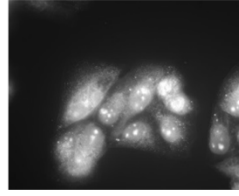

BAA-33a

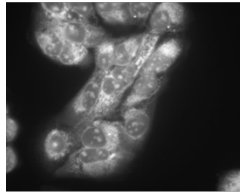

BAA-34b

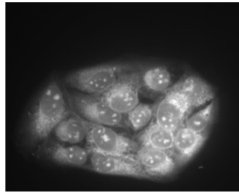

BAA-35b

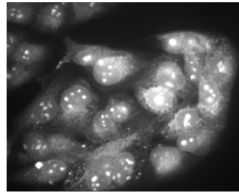

BAA-36b

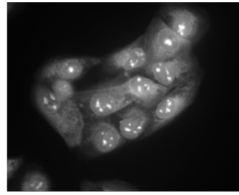

BAA-37a

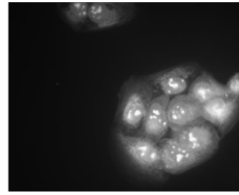

BAA-37b

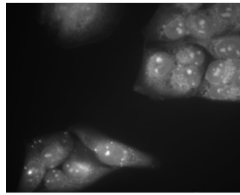

BAA-38a

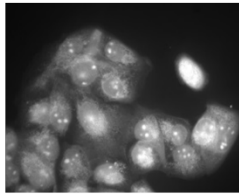

BAA-39a

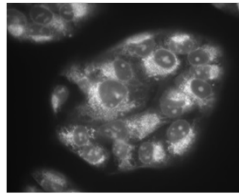

BAA-40b

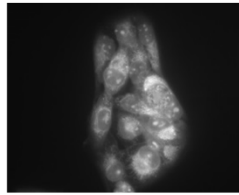

BAA-41b

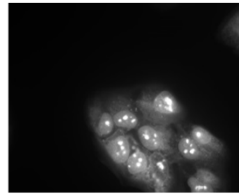

BAA-42a

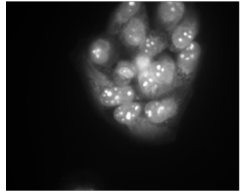

BAA-43a

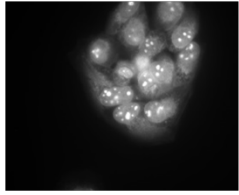

BAA-44b

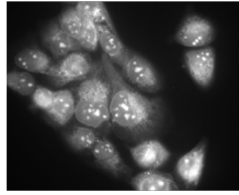

BAA-45a

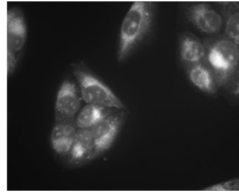

BAA-45b

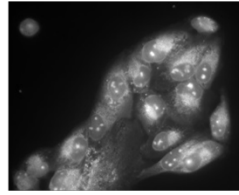

BAA-46b

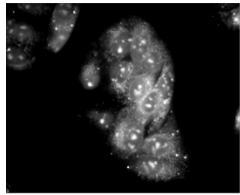

BAA-47a

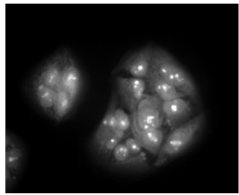

BAA-48a

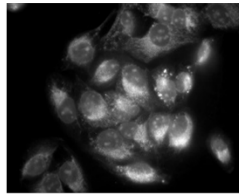

BAA-49b

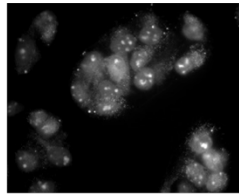

BAA-50a

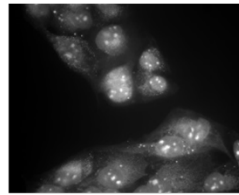

BAA-50b



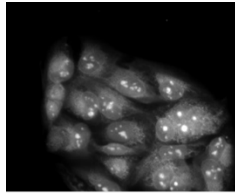

BAA-51a

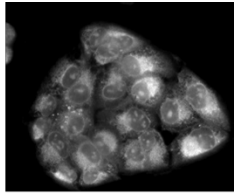

BAA-52a

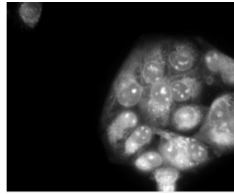

BAA-53a

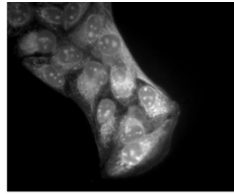

BAA-54a

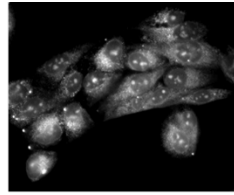

BAA-55a

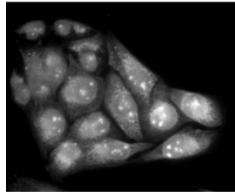

BAA-55b

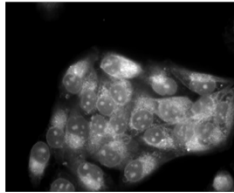

BAA-56a

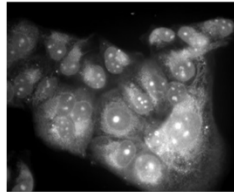

BAA-56b

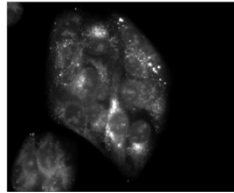

BAA-57a

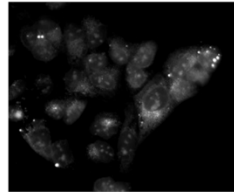

BAA-57b

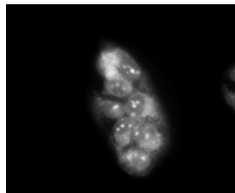

BAA-58a

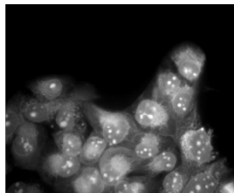

BAA-59a

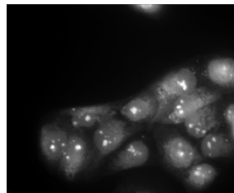

BAA-60b

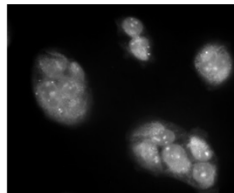

BAA-61a

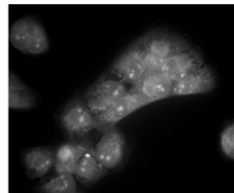

BAA-62a

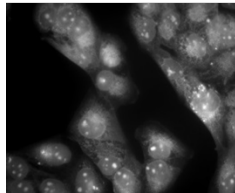

BAA-63a

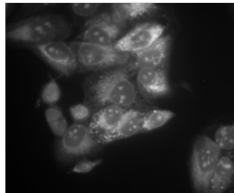

BAA-64a

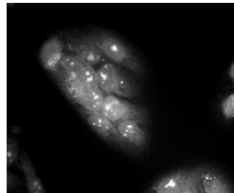

BAA-65a

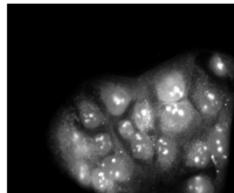

BAA-66a

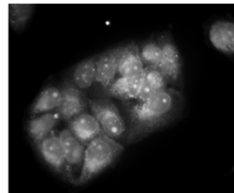

BAA-67a

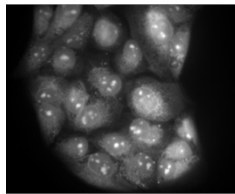

BAA-68a

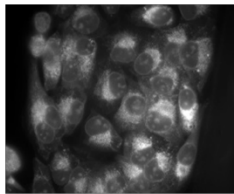

BAA-69a

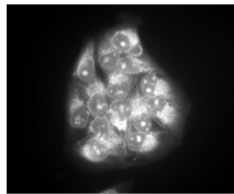

BAA-70a

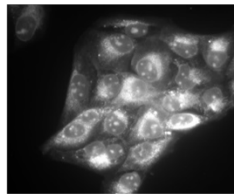

BAA-71a

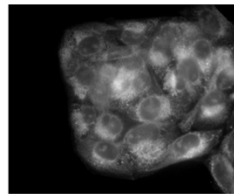

BAA-72a

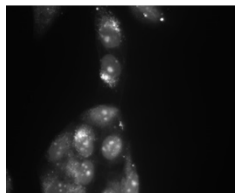

BAA-73a

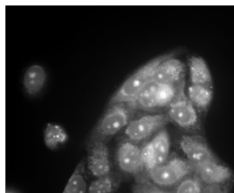

BAA-74a

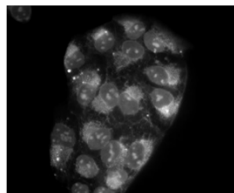

BAA-74b

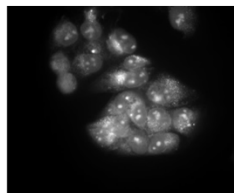

BAA-75a

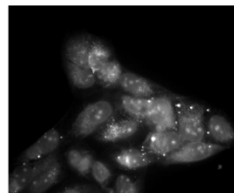

BAA-75b

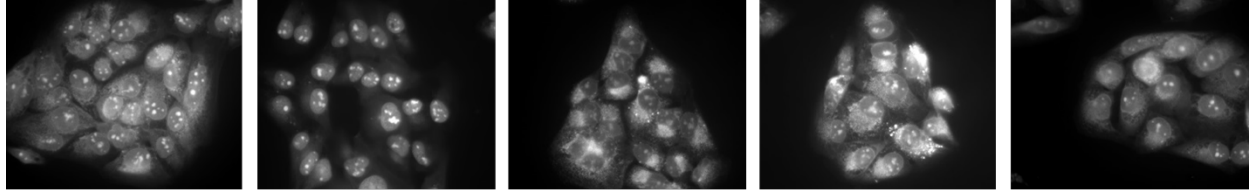

BAA-76a

BAA-77a

BAA-78a

BAA-78b

BAA-79a

Images are 168x135  $\mu\text{m}$  and shown with contrast optimized for each dye to show cellular structure localization.

**Table S4:** *Molecular properties, organelle specificity, and SBR for the BAA library.*

| Product | LogD @ pH<br>7.4 | Rotatable Bonds | H Bond<br>Donor | H Bond<br>Acceptor | Polar<br>Surface<br>Area | pK <sub>a</sub> | Cell Organelle<br>Specificity | Signal to<br>Background<br>Ratio |
|---------|------------------|-----------------|-----------------|--------------------|--------------------------|-----------------|-------------------------------|----------------------------------|
| BAA-1b  | 4.20             | 8               | 1               | 6                  | 89.48                    | 3.99            | c                             | 4.52                             |
| BAA-2a  | 0.54             | 5               | 2               | 4                  | 61.03                    | 4.54            | n                             | 1.71                             |
| BAA-3a  | 3.72             | 10              | 1               | 6                  | 82.16                    | 4.25            | c, v                          | 2.19                             |
| BAA-3b  | 0.92             | 7               | 1               | 4                  | 63.70                    | 3.55            | v                             | 1.41                             |
| BAA-4a  | -0.04            | 6               | 1               | 4                  | 51.72                    | 4.16            | c,v                           | 1.26                             |
| BAA-5a  | 1.24             | 12              | 1               | 8                  | 100.62                   | 4.25            | v                             | 2.74                             |
| BAA-6a  | 0.29             | 6               | 2               | 3                  | 70.26                    | 4.54            | c,v                           | 1.06                             |
| BAA-7a  | 0.40             | 7               | 1               | 4                  | 63.70                    | 4.25            | v                             | 1.73                             |
| BAA-7b  | 2.68             | 10              | 1               | 6                  | 82.16                    | 4.12            | c,v                           | 1.89                             |
| BAA-8a  | 1.19             | 6               | 1               | 3                  | 54.47                    | 4.25            | v                             | 1.91                             |
| BAA-9a  | -0.24            | 7               | 3               | 5                  | 94.93                    | 4.25            | c,v                           | 1.63                             |
| BAA-10b | 4.64             | 12              | 1               | 4                  | 51.72                    | 4.06            | v                             | 1.17                             |
| BAA-11a | 2.90             | 8               | 1               | 3                  | 54.47                    | 4.25            | c                             | 4.08                             |
| BAA-12a | 0.34             | 8               | 1               | 4                  | 71.02                    | 4.25            | c                             | 1.89                             |
| BAA-13a | 0.32             | 6               | 1               | 3                  | 54.47                    | 4.25            | c                             | 1.83                             |
| BAA-14a | 2.00             | 7               | 1               | 2                  | 45.24                    | 4.25            | c                             | 1.41                             |
| BAA-15a | 1.23             | 8               | 1               | 3                  | 54.47                    | 4.25            | c,v                           | 4.28                             |
| BAA-16a | 1.84             | 5               | 1               | 2                  | 45.24                    | 4.25            | c                             | 3.01                             |
| BAA-17a | 2.12             | 6               | 1               | 2                  | 45.24                    | 4.25            | c                             | 2.25                             |
| BAA-18a | 1.96             | 8               | 1               | 3                  | 54.47                    | 4.25            | c,v                           | 2.59                             |
| BAA-19a | 1.54             | 6               | 1               | 2                  | 45.24                    | 4.25            | c                             | 0.79                             |
| BAA-20a | -0.13            | 7               | 1               | 4                  | 71.02                    | 4.25            | v                             | 5.14                             |
| BAA-21a | 1.71             | 9               | 1               | 4                  | 63.70                    | 4.25            | v                             | 6.23                             |
| BAA-21b | 5.30             | 14              | 1               | 6                  | 82.16                    | 4.04            | c                             | 3.52                             |
| BAA-22a | 1.85             | 9               | 1               | 4                  | 63.70                    | 4.25            | c,v                           | 2.07                             |
| BAA-22b | 5.57             | 14              | 1               | 6                  | 82.16                    | 4.04            | c,v                           | 4.27                             |
| BAA-23a | 2.09             | 7               | 1               | 3                  | 58.13                    | 4.29            | v                             | 0.82                             |
| BAA-23b | 6.06             | 10              | 1               | 4                  | 71.02                    | 4.39            | c,v                           | 1.71                             |
| BAA-24b | 4.73             | 6               | 1               | 2                  | 45.24                    | 3.75            | c,v                           | 1.33                             |
| BAA-25a | 2.52             | 7               | 1               | 2                  | 54.47                    | 4.24            | c                             | 1.33                             |
| BAA-25b | 6.93             | 10              | 1               | 2                  | 63.70                    | 3.95            | c                             | 1.52                             |
| BAA-26b | 4.05             | 16              | 1               | 6                  | 82.16                    | 4.00            | v                             | 1.29                             |
| BAA-27b | 6.65             | 10              | 1               | 2                  | 63.70                    | 4.07            | c,v                           | 4.33                             |
| BAA-28a | -0.27            | 6               | 1               | 3                  | 63.06                    | 4.26            | v                             | 1.86                             |
| BAA-28b | 1.34             | 8               | 1               | 4                  | 80.88                    | 4.41            | v                             | 1.37                             |
| BAA-29b | 4.83             | 6               | 1               | 2                  | 45.24                    | 3.92            | c,v                           | 1.06                             |
| BAA-30a | -4.22            | 8               | 2               | 5                  | 85.75                    | 3.52/4.34       | n                             | 1.17                             |
| BAA-31b | 2.44             | 6               | 3               | 4                  | 85.70                    | 4.03            | c,v                           | 1.61                             |
| BAA-32a | 1.82             | 8               | 1               | 4                  | 97.61                    | 4.25            | c                             | 3.73                             |
| BAA-33a | 0.00             | 6               | 1               | 4                  | 79.38                    | 3.99            | c,v                           | 1.57                             |
| BAA-34b | 5.19             | 8               | 1               | 4                  | 71.02                    | 4.60            | c                             | 2.57                             |
| BAA-35b | 5.24             | 10              | 1               | 4                  | 111.28                   | 4.03            | c                             | 1.51                             |
| BAA-36b | 4.85             | 12              | 1               | 6                  | 111.28                   | 4.26            | c,v                           | 2.48                             |
| BAA-37a | 0.81             | 6               | 1               | 3                  | 58.13                    | 4.12            | c                             | 2.31                             |
| BAA-37b | 3.50             | 8               | 1               | 4                  | 71.02                    | 4.07            | c                             | 1.42                             |
| BAA-38a | 0.68             | 6               | 1               | 4                  | 61.37                    | 4.26            | c,v                           | 1.50                             |
| BAA-39a | 0.39             | 6               | 1               | 4                  | 61.37                    | 4.07            | c                             | 1.18                             |
| BAA-40b | 7.06             | 16              | 1               | 6                  | 82.16                    | 4.00            | c                             | 1.52                             |

| Product | LogD @ pH 7.4 | Rotatable Bonds | H Bond Donor | H Bond Acceptor | Polar Surface Area | pK <sub>a</sub> | Cell Organelle Specificity | Signal to Background Ratio |
|---------|---------------|-----------------|--------------|-----------------|--------------------|-----------------|----------------------------|----------------------------|
| BAA-41b | 6.23          | 14              | 1            | 6               | 82.16              | 4.04            | c                          | 1.94                       |
| BAA-42a | 3.30          | 8               | 1            | 3               | 71.54              | 4.25            | c                          | 1.69                       |
| BAA-43a | 2.78          | 8               | 1            | 3               | 71.54              | 4.25            | c                          | 2.16                       |
| BAA-44b | 7.06          | 16              | 1            | 6               | 82.16              | 4.04            | c                          | 3.26                       |
| BAA-45b | 7.12          | 12              | 1            | 4               | 63.70              | 4.25            | c                          | 2.34                       |
| BAA-45a | 2.62          | 8               | 1            | 3               | 54.47              | 4.19            | c                          | 5.01                       |
| BAA-46b | 5.30          | 14              | 1            | 6               | 82.16              | 4.12            | c                          | 6.52                       |
| BAA-47a | 0.62          | 9               | 1            | 4               | 63.70              | 4.25            | v                          | 5.90                       |
| BAA-48a | 2.06          | 8               | 2            | 3               | 70.26              | 4.53            | c                          | 1.77                       |
| BAA-49b | 0.50          | 12              | 1            | 8               | 129.74             | 3.86            | c                          | 1.00                       |
| BAA-50a | 0.52          | 6               | 1            | 3               | 63.06              | 4.25            | v                          | 1.97                       |
| BAA-50b | 2.92          | 8               | 1            | 4               | 80.88              | 4.29            | c,v                        | 1.50                       |
| BAA-51a | -0.02         | 7               | 2            | 4               | 83.57              | 4.25            | c                          | 10.02                      |
| BAA-52a | 0.72          | 8               | 1            | 4               | 63.70              | 4.25            | c                          | 0.77                       |
| BAA-53a | -0.07         | 7               | 1            | 4               | 63.70              | 4.25            | c,v                        | 0.63                       |
| BAA-54a | 1.10          | 5               | 1            | 2               | 45.24              | 4.25            | c,v                        | 0.69                       |
| BAA-55a | 0.41          | 6               | 1            | 3               | 63.06              | 4.25            | v                          | 2.61                       |
| BAA-55b | 2.69          | 8               | 1            | 4               | 80.88              | 4.20            | c                          | 1.54                       |
| BAA-56a | 0.62          | 6               | 1            | 5               | 58.13              | 4.25            | c,v                        | 1.63                       |
| BAA-56b | 3.13          | 8               | 1            | 6               | 71.02              | 4.77            | c,v                        | 1.44                       |
| BAA-57a | 0.87          | 6               | 1            | 3               | 63.06              | 4.25            | v                          | 1.67                       |
| BAA-57b | 3.63          | 8               | 1            | 4               | 80.88              | 4.17            | v                          | 3.63                       |
| BAA-58a | 2.27          | 8               | 1            | 3               | 71.54              | 4.25            | c                          | 19.25                      |
| BAA-59a | 0.26          | 7               | 1            | 5               | 92.27              | 4.25            | c                          | 1.77                       |
| BAA-60b | 4.60          | 8               | 1            | 2               | 45.24              | 4.77            | v                          | 6.04                       |
| BAA-61a | 1.02          | 9               | 3            | 5               | 94.93              | 4.25            | c,v                        | 4.57                       |
| BAA-62a | 0.13          | 5               | 1            | 3               | 58.13              | 4.16            | c,v                        | 1.79                       |
| BAA-63a | 1.88          | 5               | 1            | 3               | 58.13              | 4.24            | c                          | 5.92                       |
| BAA-64a | 1.37          | 6               | 2            | 3               | 73.92              | 4.25            | c,v                        | 1.95                       |
| BAA-65a | 0.97          | 6               | 1            | 2               | 58.38              | 4.25            | c,v                        | 1.04                       |
| BAA-66a | 1.07          | 6               | 1            | 3               | 58.13              | 4.25            | c,v                        | 0.94                       |
| BAA-67a | 2.10          | 8               | 1            | 3               | 58.13              | 4.26            | v                          | 1.94                       |
| BAA-68a | 0.98          | 6               | 1            | 3               | 58.13              | 4.26            | v                          | 1.86                       |
| BAA-69a | 2.24          | 6               | 1            | 3               | 58.13              | 4.26            | c,v                        | 0.96                       |
| BAA-70a | 2.09          | 7               | 1            | 3               | 58.13              | 4.26            | c,v                        | 2.08                       |
| BAA-71a | 2.89          | 8               | 1            | 4               | 67.36              | 4.26            | c,v                        | 1.88                       |
| BAA-72a | 1.49          | 6               | 1            | 3               | 58.13              | 4.26            | c,v                        | 5.15                       |
| BAA-73a | 0.95          | 8               | 1            | 3               | 54.47              | 4.25            | v                          | 1.90                       |
| BAA-74a | 0.97          | 13              | 1            | 7               | 99.23              | 4.25            | c,v                        | 2.70                       |
| BAA-74b | 3.82          | 22              | 1            | 12              | 153.22             | 4.00            | c,v                        | 2.25                       |
| BAA-75a | -0.18         | 10              | 1            | 5               | 96.06              | 4.25            | v                          | 3.83                       |
| BAA-75b | 1.52          | 16              | 1            | 8               | 146.88             | 4.27            | v                          | 1.34                       |
| BAA-76a | 1.10          | 7               | 1            | 3               | 67.61              | 4.25            | c,v                        | 1.58                       |
| BAA-77a | 2.06          | 8               | 2            | 3               | 70.26              | 4.28            | n                          | 3.21                       |
| BAA-78a | 1.92          | 9               | 1            | 5               | 97.61              | 4.25            | c,v                        | 6.81                       |
| BAA-78b | 5.71          | 14              | 1            | 8               | 149.98             | 4.12            | c,v                        | 2.44                       |
| BAA-79a | 2.06          | 6               | 1            | 2               | 58.38              | 4.25            | c                          | 3.43                       |

BAA compounds showed localization to cytosol (c), vesicles (v), and nucleolar (n) regions.

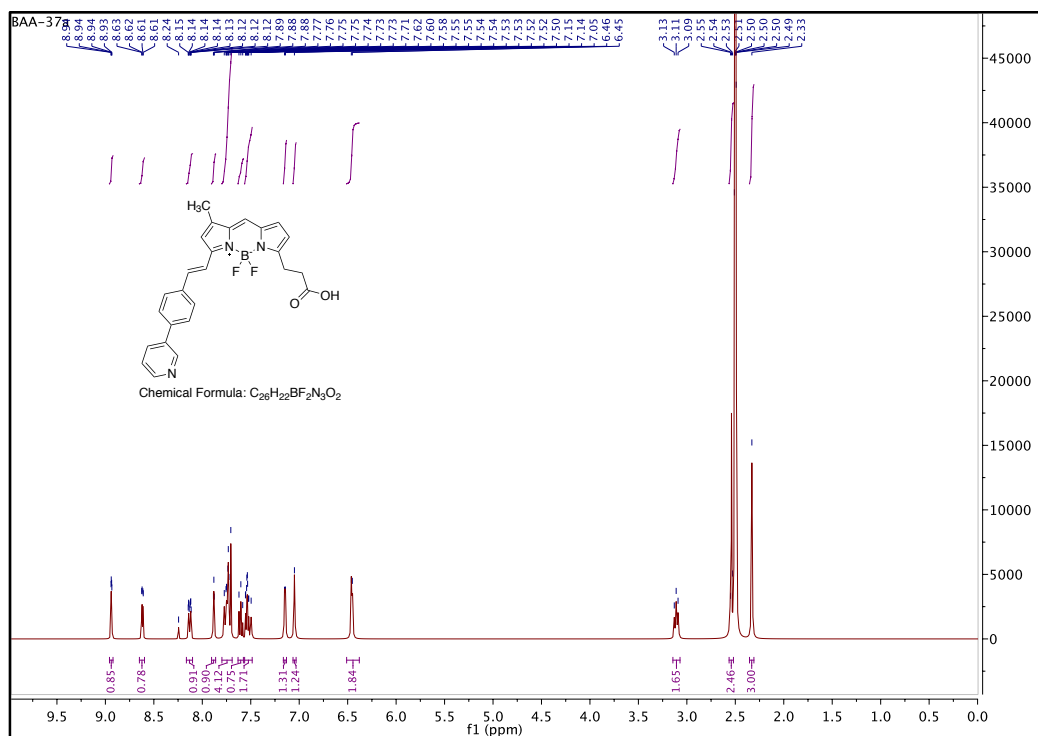

**Figure S1:**  $^1H$  NMR spectrum of compound **BAA-37a**: (400 MHz,  $DMSO-d_6$ )  $\delta$  8.94 (dd,  $J = 2.5$ , 0.9 Hz, 1H), 8.62 (dd,  $J = 4.8$ , 1.6 Hz, 1H), 8.13 (ddd,  $J = 8.0$ , 2.5, 1.6 Hz, 1H), 7.88 (t,  $J = 1.7$  Hz, 1H), 7.80 – 7.69 (m, 4H), 7.60 (t,  $J = 7.7$  Hz, 1H), 7.56 – 7.49 (m, 2H), 7.15 (d,  $J = 4.0$  Hz, 1H), 7.05 (s, 1H), 6.46 (d,  $J = 4.0$  Hz, 2H), 3.11 (t,  $J = 7.8$  Hz, 2H), 2.53 (t,  $J = 7.8$  Hz, 2H), 2.33 (s, 3H).

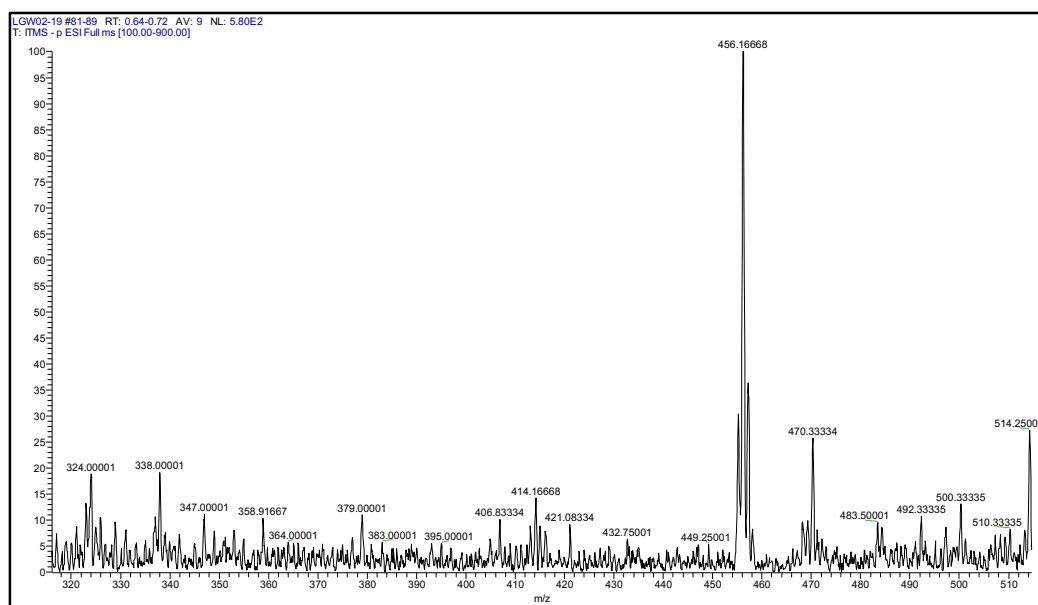

**Figure S2:** HR ESI negative mode spectrum of compound **BAA-37a**. HRMS-ESI (m/z):  $[M-H]^-$  calculated for  $C_{26}H_{21}BF_2N_3O_2^-$ : 456.17004; found: 456.16668 (7.4 ppm).

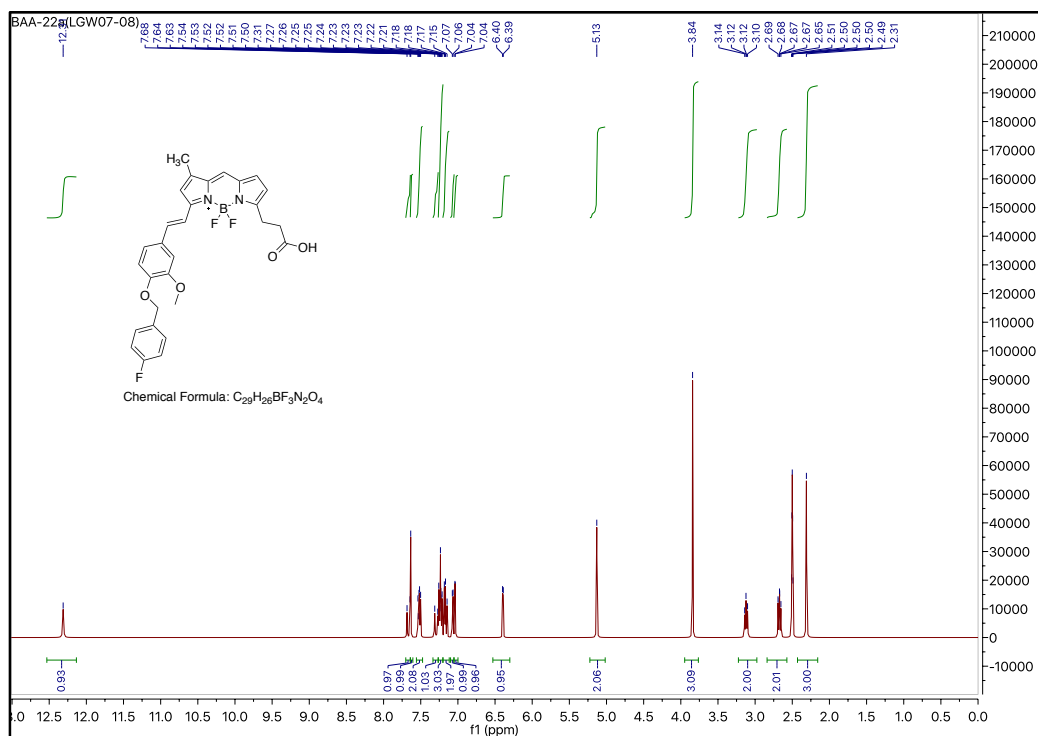

**Figure S3:**  $^1\text{H}$  NMR spectrum of compound **BAA-22a**: (400 MHz,  $\text{DMSO-}d_6$ )  $\delta$  12.31 (s, 1H), 7.66 (d,  $J = 16.3$  Hz, 1H), 7.63 (s, 1H), 7.56 – 7.48 (m, 2H), 7.29 (d,  $J = 16.3$  Hz, 1H), 7.26 – 7.20 (m, 3H), 7.20 – 7.12 (m, 2H), 7.07 (d,  $J = 4.0$  Hz, 1H), 7.04 (s, 1H), 6.39 (d,  $J = 3.9$  Hz, 1H), 5.13 (s, 2H), 3.84 (s, 3H), 3.12 (t, 2H), 2.67 (t, 2H), 2.31 (s, 3H).

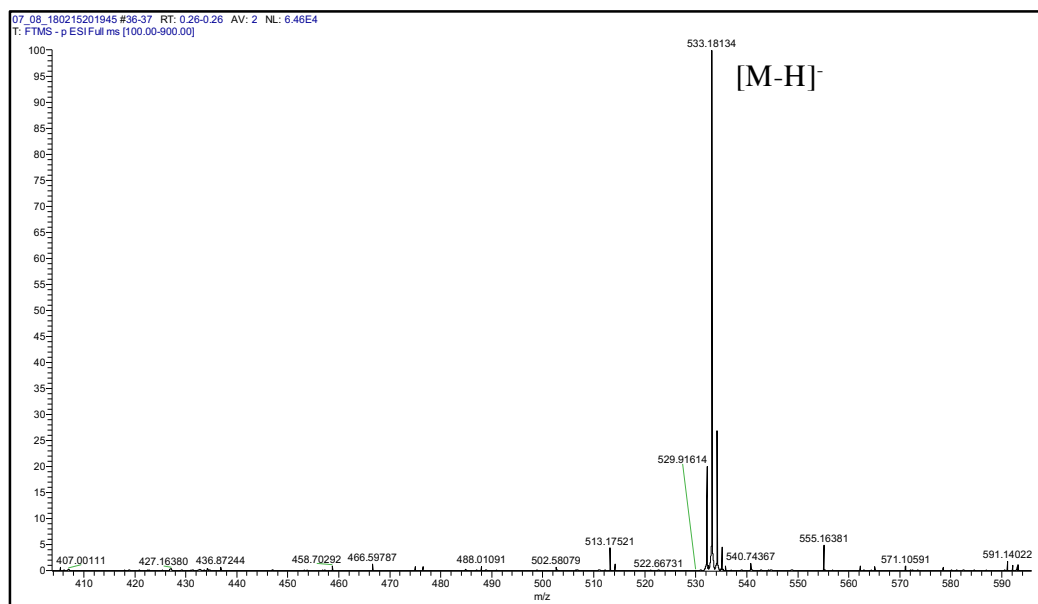

**Figure S4:** HR ESI negative mode spectrum of compound **BAA-22a**. HRMS-ESI ( $m/z$ ):  $[\text{M-H}]^-$  calculated for  $\text{C}_{29}\text{H}_{25}\text{BF}_3\text{N}_2\text{O}_4^-$ : 533.18650; found: 533.18134 (9.7 ppm).

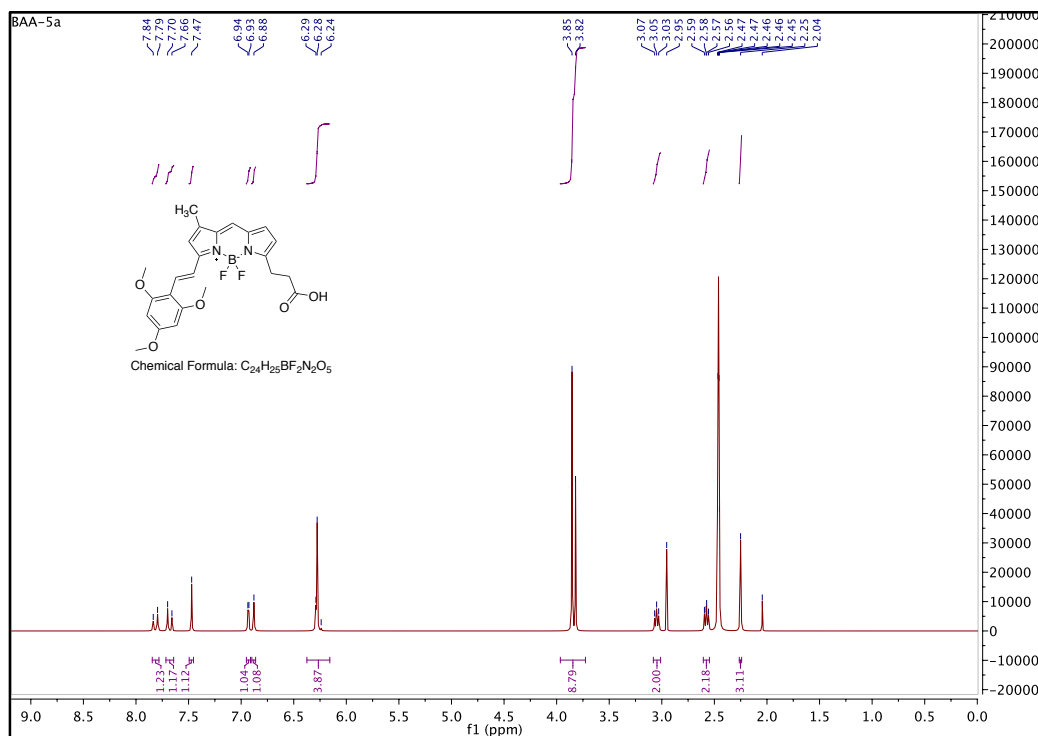

**Figure S5:**  $^1H$  NMR spectrum of compound **BAA-5a**: (400 MHz,  $DMSO-d_6$ )  $\delta$  7.82 (d,  $J = 16.4$  Hz, 1H), 7.68 (d,  $J = 16.4$  Hz, 1H), 7.47 (s, 1H), 6.93 (d,  $J = 4.0$  Hz, 1H), 6.88 (s, 1H), 6.37 – 6.16 (m, 4H), 3.96 – 3.73 (m, 9H), 3.05 (t,  $J = 7.7$  Hz, 2H), 2.58 (t,  $J = 7.7$  Hz, 2H), 2.25 (s, 3H).

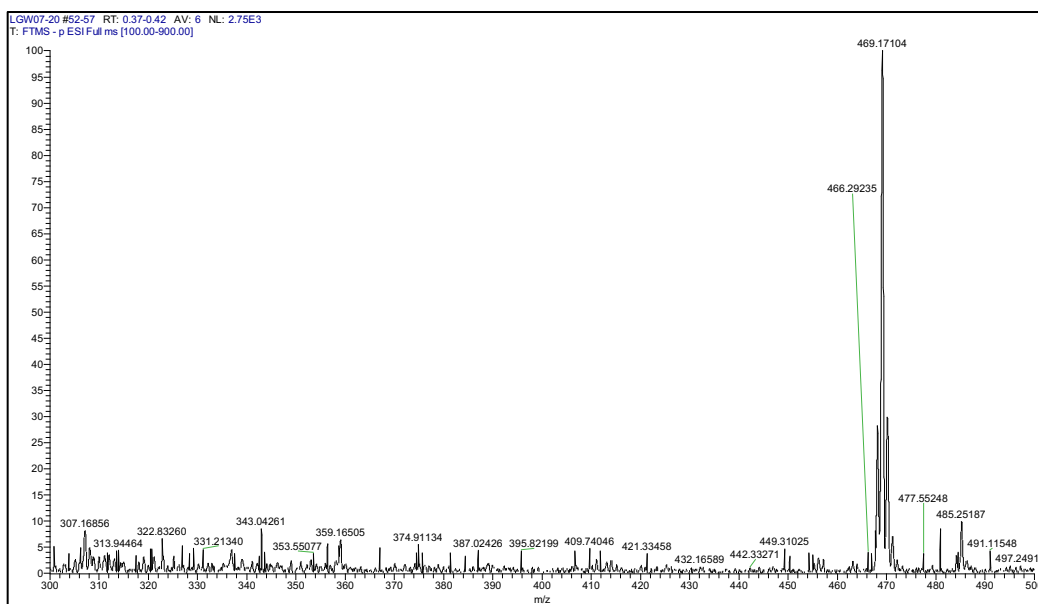

**Figure S6:** HR ESI negative mode spectrum of compound **BAA-5a**. HRMS-ESI (m/z):  $[M-H]^-$  calculated for  $C_{24}H_{24}BF_2N_2O_5^-$ : 469.17518; found: 469.17104 (9.7 ppm).

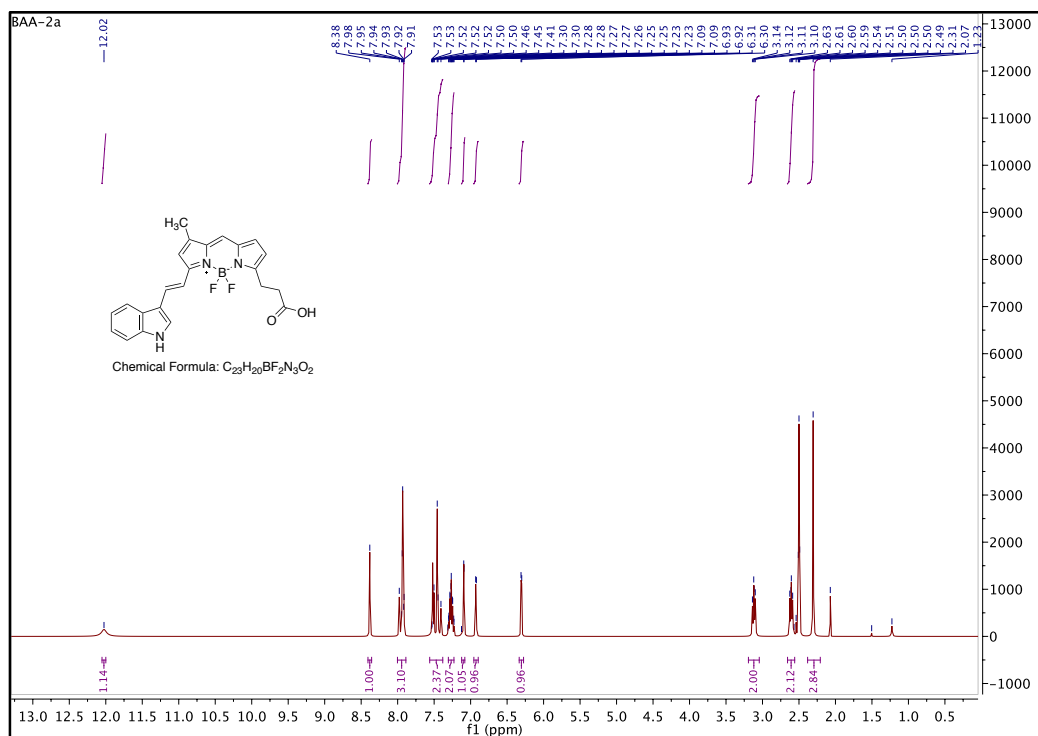

**Figure S7:**  $^1H$  NMR spectrum of compound **BAA-2a**: (400 MHz,  $DMSO-d_6$ )  $\delta$  12.02 (s, 1H), 8.38 (s, 1H), 8.00 – 7.89 (m, 3H), 7.56 – 7.38 (m, 2H), 7.31 – 7.23 (m, 2H), 7.09 (s, 1H), 6.93 (d,  $J = 3.9$  Hz, 1H), 6.30 (d,  $J = 3.9$  Hz, 1H), 3.12 (t,  $J = 8.8$  Hz, 2H), 2.61 (t,  $J = 8.8$  Hz, 2H), 2.31 (s, 3H).

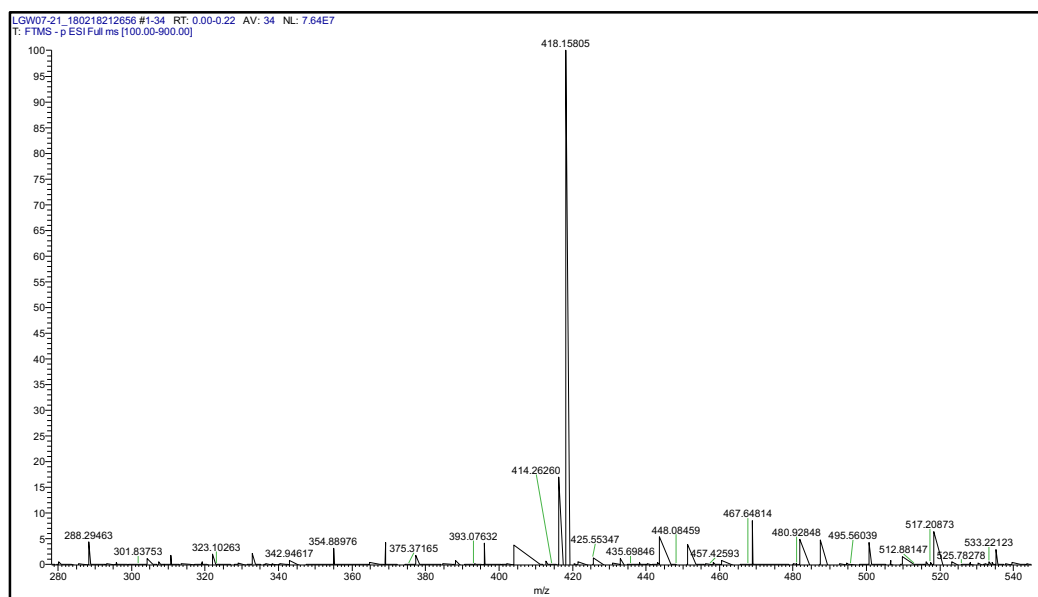

**Figure S8:** HR ESI negative mode spectrum of compound **BAA-2a**. HRMS-ESI ( $m/z$ ):  $[M-H]^-$  calculated for  $C_{23}H_{19}BF_2N_3O_2^-$ : 418.15439; found: 418.15805 (8.8 ppm).



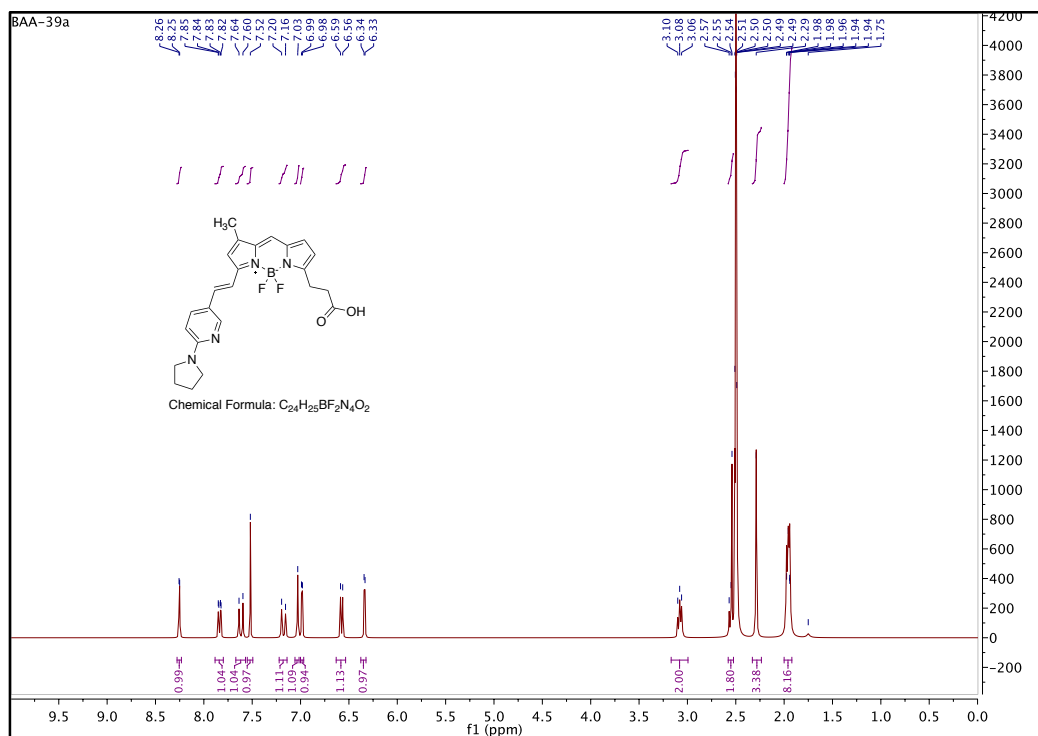

**Figure S9:**  $^1H$  NMR spectrum of compound **BAA-39a**: (400 MHz,  $DMSO-d_6$ )  $\delta$  8.25 (d,  $J = 2.5$  Hz, 1H), 7.84 (dd,  $J = 9.0, 2.4$  Hz, 1H), 7.62 (d,  $J = 16.2$  Hz, 1H), 7.52 (s, 1H), 7.18 (d,  $J = 16.2$  Hz, 1H), 7.03 (s, 1H), 6.99 (d,  $J = 3.9$  Hz, 1H), 6.58 (d,  $J = 9.0$  Hz, 1H), 6.34 (d,  $J = 4.0$  Hz, 1H), 3.08 (t,  $J = 11.8$  Hz, 2H), 2.55 (t,  $J = 11.8$  Hz, 2H), 2.26 (s, 3H), 2.00 – 1.92 (m, 8H).

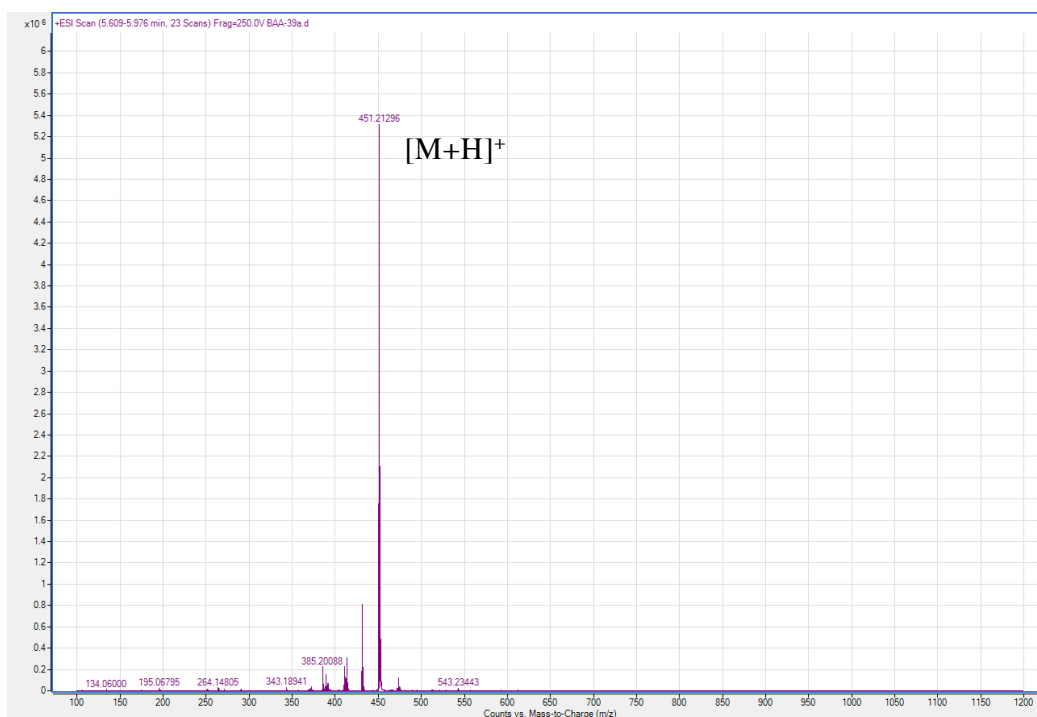

**Figure S10:** HR ESI negative mode spectrum of compound **BAA-39a**. HRMS-ESI ( $m/z$ ):  $[M+H]^+$  calculated for  $C_{24}H_{26}BF_2N_4O_2^+$ : 451.21114; found: 451.21296 (4.0 ppm).

A. BAA-37a

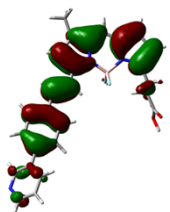

B. BAA-22a

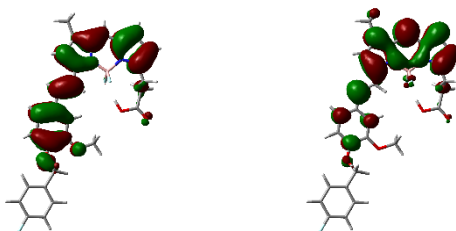

C. BAA-5a

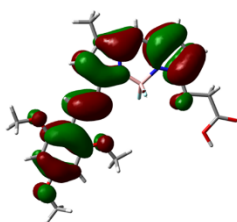

D. BAA-2a

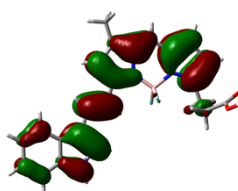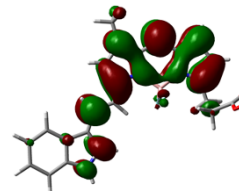

E. BAA-39a

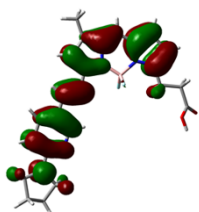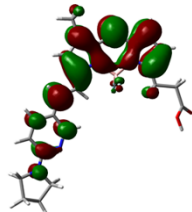

**Figure S11:** The HOMO and LUMO molecular orbitals are shown on the left and right, respectively of the five selected BAA compounds for immunofluorescence imaging. **A. BAA-37a**, **B. BAA-22a**, **C. BAA-5a**, **D. BAA-2a** and **E. BAA-39a**.
